# Supplementary material for: In situ neutron diffraction study of the high-temperature redox chemistry of Ln3−xSr1+xCrNiO8−δ (Ln = La, Nd) under hydrogen
Source: Royal Society of Chemistry journal article supplement (doi:10.1039/b926282b), 2010-01-01
Supplement: b926282b.pdf [file b926282b.pdf]

**Supporting Information for:**

***In Situ* Neutron Diffraction Study of the High-Temperature Redox Chemistry of  $\text{Ln}_{3-x}\text{Sr}_{1+x}\text{CrNiO}_{8-\delta}$  ( $\text{Ln} = \text{La}, \text{Nd}$ ) under Hydrogen**

Florent Tonus<sup>1</sup>, Mona Bahout<sup>1,\*</sup>, Peter D. Battle<sup>2,\*</sup>, Thomas Hansen<sup>3</sup>, Paul Henry<sup>4</sup> and T. Roisnel<sup>1</sup>

1. Université de Rennes 1, Laboratoire Sciences Chimiques de Rennes, UMR CNRS 6226, 263 avenue du général Leclerc, 35402, Rennes CEDEX, France
2. Inorganic Chemistry Laboratory, University of Oxford, South Parks Road, Oxford, OX1 3QR, U. K.
3. Institut Laue Langevin, 6 rue Jules Horowitz, BP156, 38042 Grenoble CEDEX 9, France
4. MI-1, Helmholtz Zentrum Berlin, Hahn-Meitner-Platz 1, 14109, Berlin, Germany.

**Figure S1.** Thermogravimetric analysis (heating rate of  $2\text{ }^{\circ}\text{C min}^{-1}$ ) under 5 %  $\text{H}_2$  in  $\text{N}_2$  for  $\text{Nd}_{2.25}\text{Sr}_{1.75}\text{CrNiO}_{8.6}$

**Figure S2.** XRD pattern fit at room temperature of  $\text{La}_2\text{Sr}_2\text{CrNiO}_{8.6}$ ; (a) as-prepared, (b) after hydrogen reduction (in 5%  $\text{H}_2$  at  $700\text{ }^{\circ}\text{C}$ , 8h)

**Figure S3.** XRD pattern fit at room temperature of  $\text{Nd}_2\text{Sr}_2\text{CrNiO}_{8.6}$ ; (a) as-prepared, (b) after hydrogen reduction (in 5%  $\text{H}_2$  at  $700\text{ }^{\circ}\text{C}$ , 8h)

**Figure S4.** XRD pattern fit at room temperature of  $\text{Nd}_{2.25}\text{Sr}_{1.75}\text{CrNiO}_{8.6}$ ; (a) as-prepared, (b) after hydrogen reduction (in 5%  $\text{H}_2$  at  $700\text{ }^{\circ}\text{C}$  8h)

**Figure S5.** Neutron Powder Diffraction pattern fit of  $\text{Nd}_2\text{Sr}_2\text{CrNiO}_{8.6}$ ; (a) at  $20\text{ }^{\circ}\text{C}$  before hydrogen reduction, (b) at  $710\text{ }^{\circ}\text{C}$  after reduction, (c) at  $90\text{ }^{\circ}\text{C}$  after reduction and cooling

**Figure S6.** Neutron Powder Diffraction pattern fit of  $\text{Nd}_{2.25}\text{Sr}_{1.75}\text{CrNiO}_{8.6}$ ; (a) at  $20\text{ }^{\circ}\text{C}$  before hydrogen reduction, (b) at  $450\text{ }^{\circ}\text{C}$  after reduction, (c) at  $80\text{ }^{\circ}\text{C}$  after reduction

**Figure S7.** Occupancy factor of oxygen sites in (a)  $\text{Nd}_2\text{Sr}_2\text{CrNiO}_{8.6}$  and (b)  $\text{Nd}_{2.25}\text{Sr}_{1.75}\text{CrNiO}_{8.6}$  as a function of temperature under hydrogen flow. Green and black squares represent the occupancy of O1 (axial) and O2 (equatorial) sites during heating; blue and red triangles represent O1 and O2 on cooling. The blue line corresponds to the Ni (II) composition

**Figure S8.** Temperature dependence of the unit cell parameters of (a)  $\text{Nd}_2\text{Sr}_2\text{CrNiO}_{8.6}$  and (b)  $\text{Nd}_{2.25}\text{Sr}_{1.75}\text{CrNiO}_{8.6}$  under hydrogen flow. Squares (triangles) represent data collected on heating (cooling).

**Figure S9.** (a) Occupancy factor of oxygen sites in  $\text{Nd}_2\text{Sr}_2\text{CrNiO}_{8.6}$  as a function of temperature under oxidizing conditions after reduction. Green and black squares represent the occupancy of O1 (axial) and O2 (equatorial) sites during heating; blue and red triangles represent O1 and O2 during cooling;

This journal is (c) The Royal Society of Chemistry 2010

(b) temperature dependence of the unit cell parameters of  $\text{Nd}_2\text{Sr}_2\text{CrNiO}_{8-\delta}$  under oxidizing conditions. Squares (triangles) represent data collected on heating (cooling)

**Figure S10** Rietveld refinements of the X ray diffraction pattern of  $\text{Nd}_2\text{Sr}_2\text{CrNiO}_{7.38}$  between  $2\theta = 76.6^\circ$  and  $81.1^\circ$  (a) with a single profile for all peaks, (b) with anisotropic peak-broadening taken into account.

**Figure S11.** Temperature dependence of the (a) Cr/Ni-O1, (b) Nd/Sr-O1 (along the *c*-axis) and (c) Nd/Sr-O2 bond lengths under hydrogen flow, in  $\text{Nd}_2\text{Sr}_2\text{CrNiO}_{8-\delta}$ . Squares (triangles) represent data collected on heating (cooling)

**Figure S12.** Temperature dependence of the (a) Cr/Ni-O1, (b) Nd/Sr-O1 (along the *c*-axis) and (c) Nd/Sr-O2 bond lengths under hydrogen flow, in  $\text{Nd}_{2.25}\text{Sr}_{1.75}\text{CrNiO}_{8-\delta}$ . Squares (triangles) represent data collected on heating (cooling)

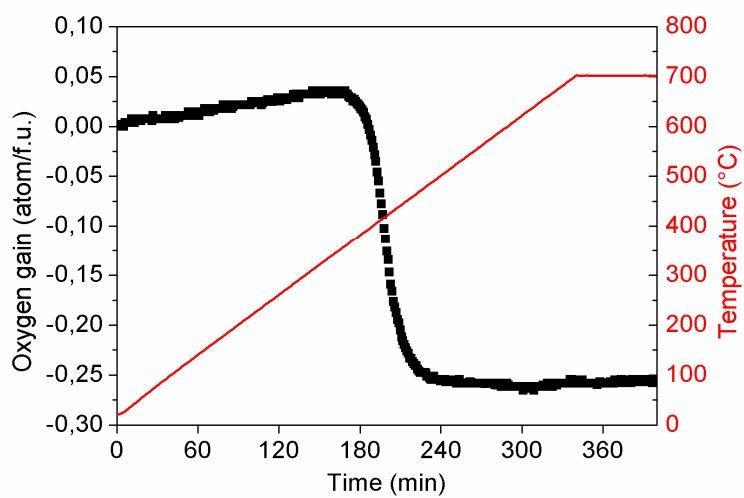

Figure S1

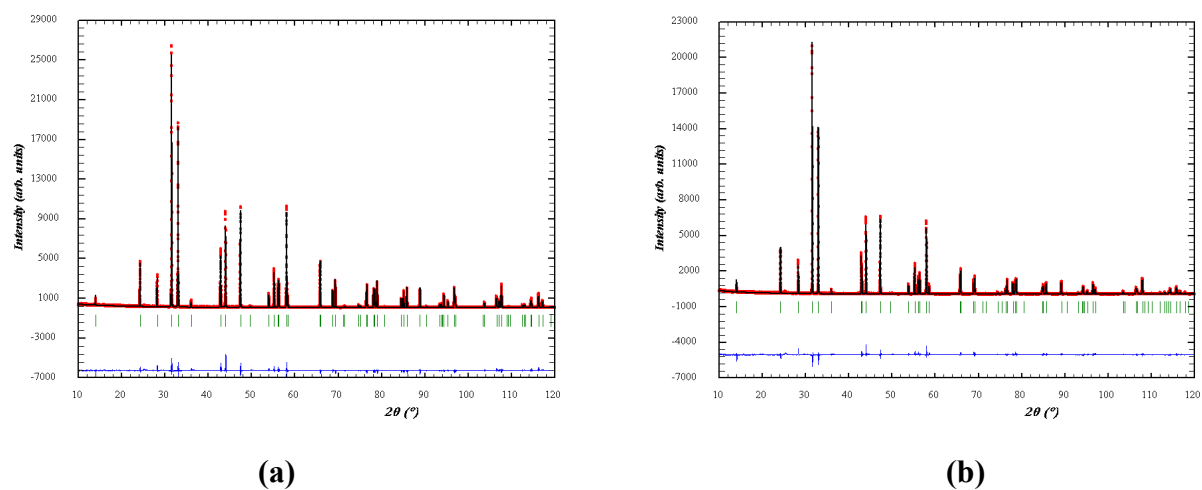

Figure S2

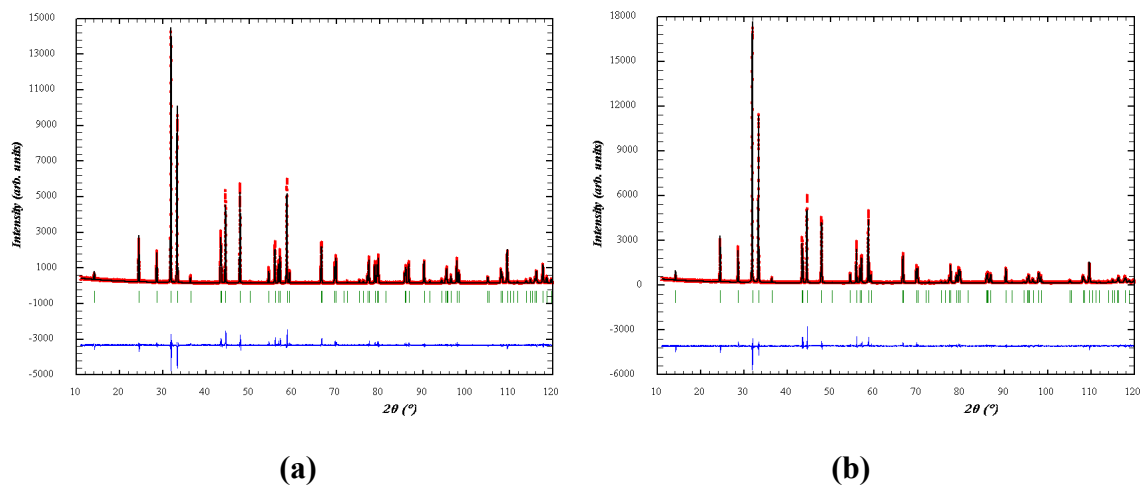

Figure S3

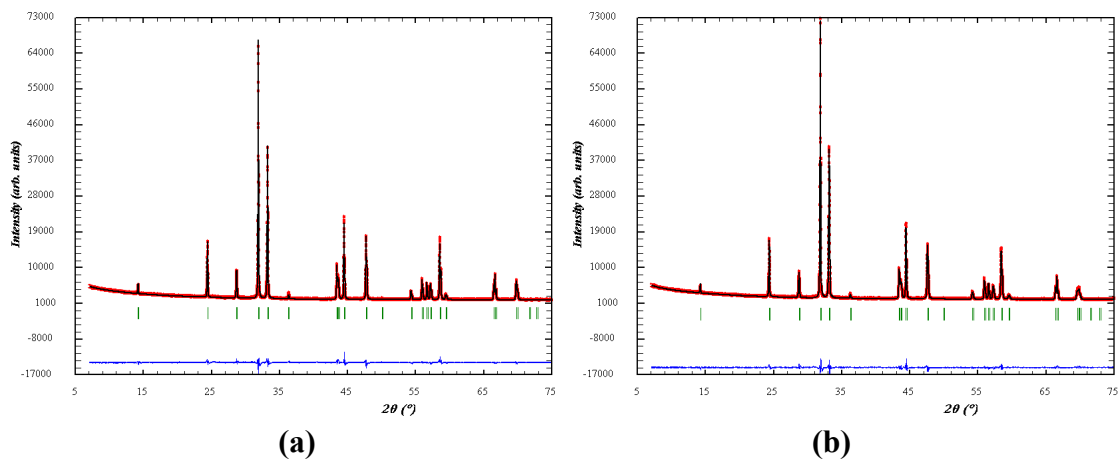

Figure S4

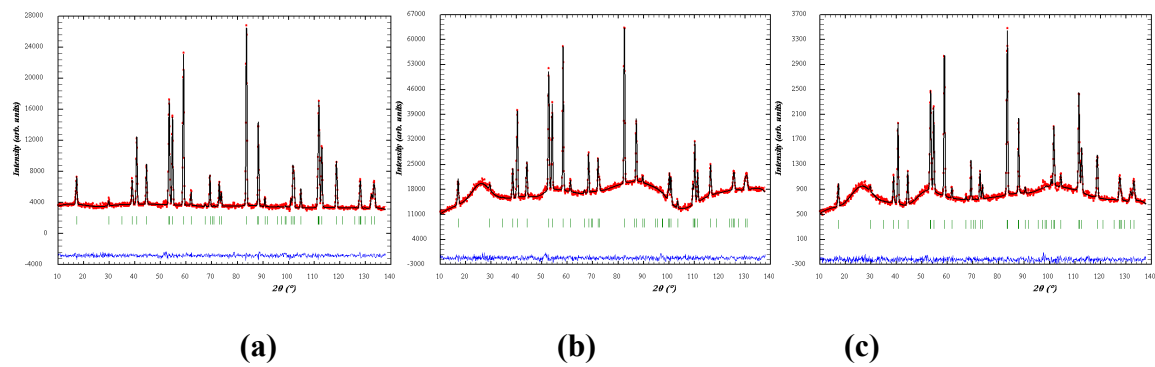

Figure S5

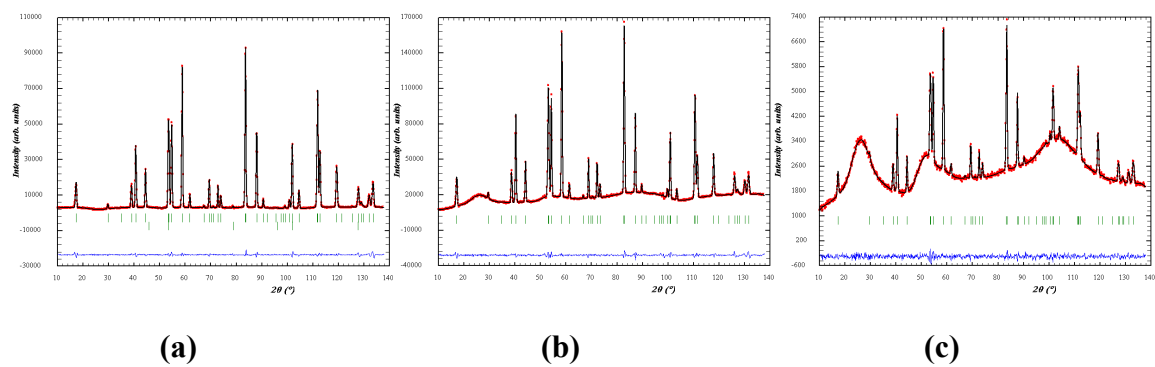

Figure S6

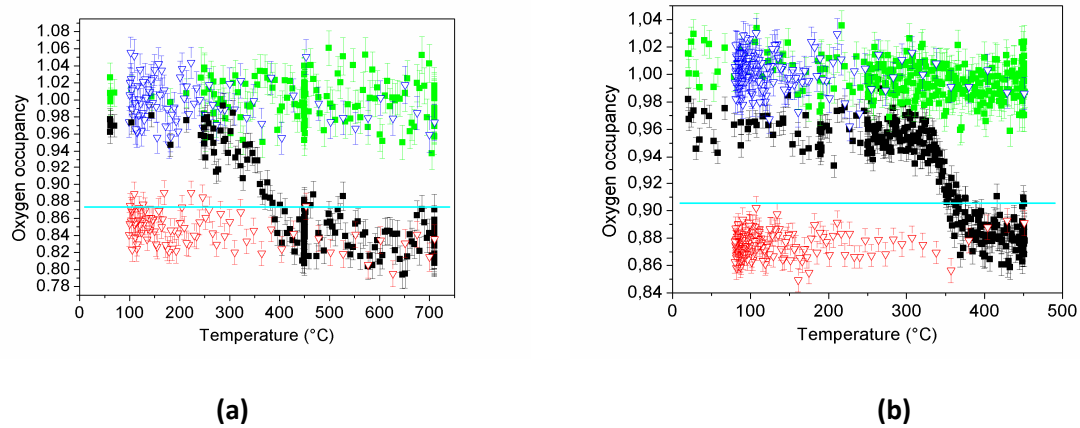

Figure S7

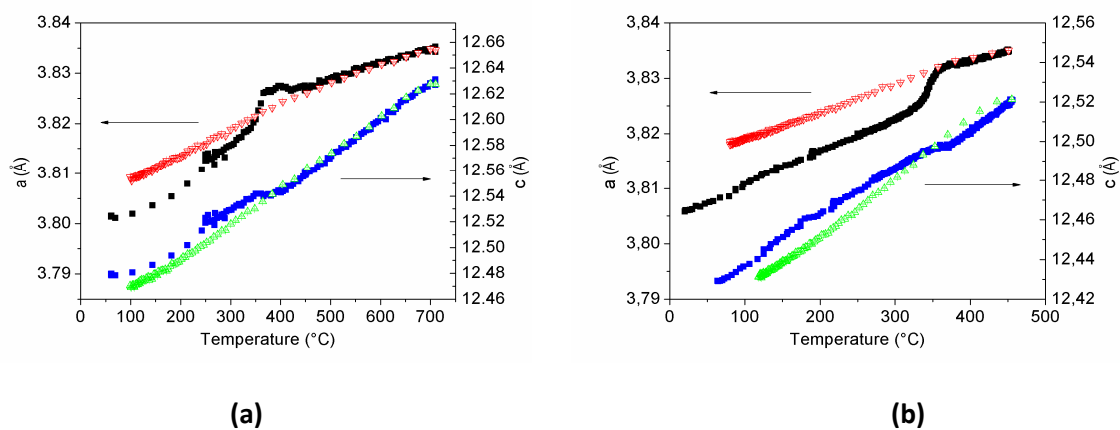

Figure S8

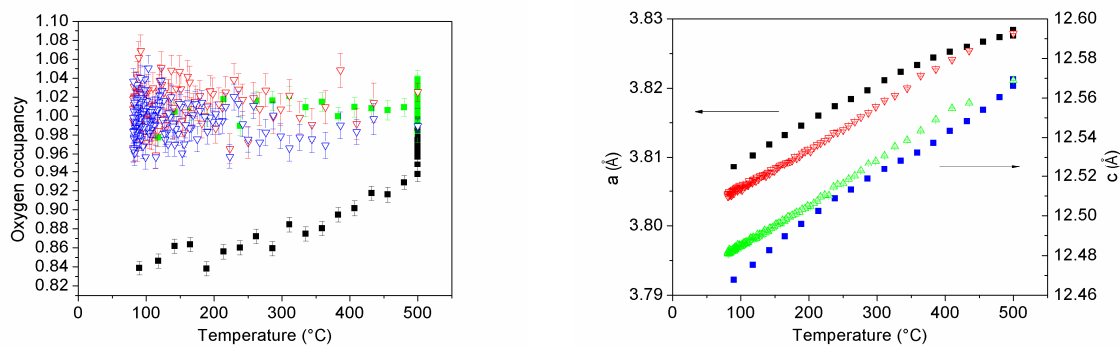

(a)

(b)

Figure S9

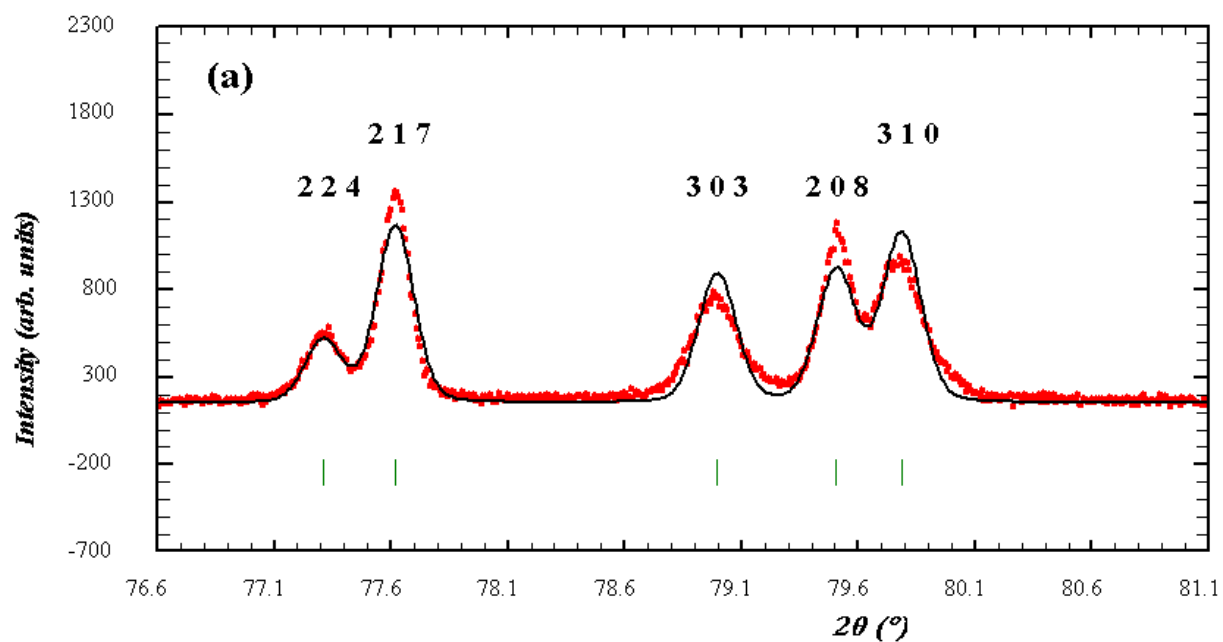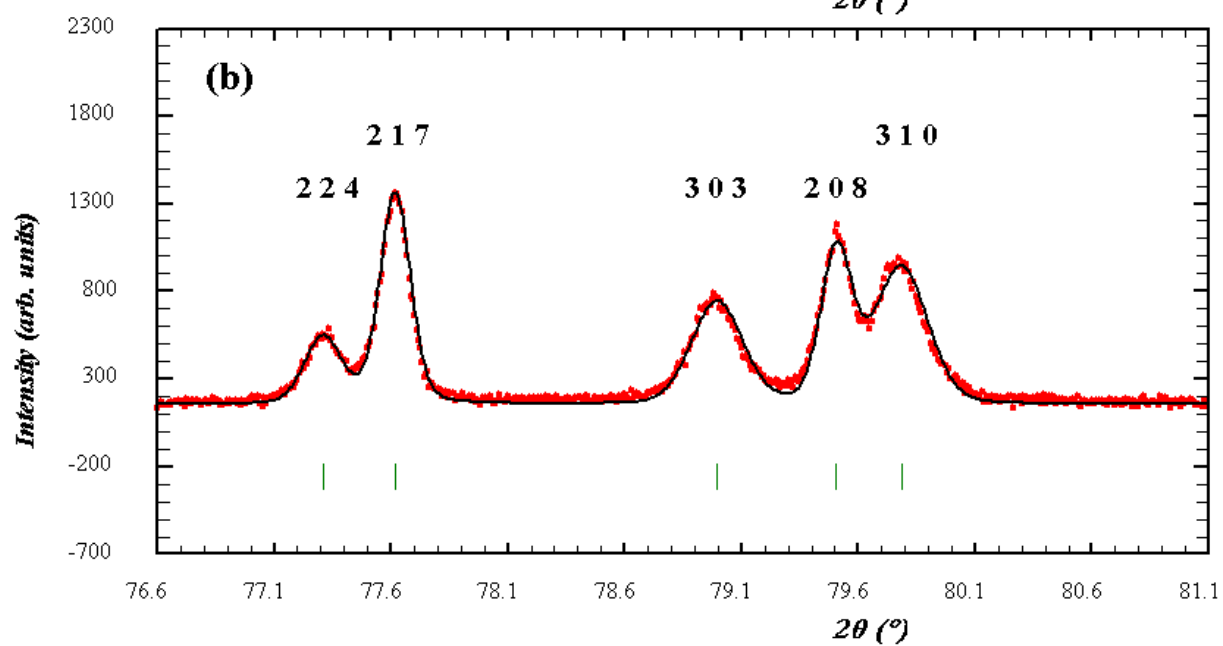

Figure S10



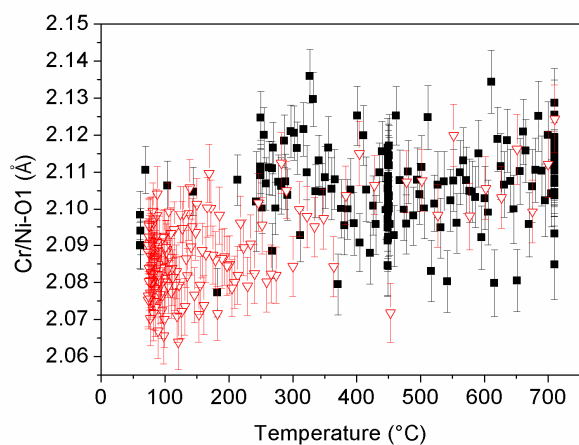

(a)

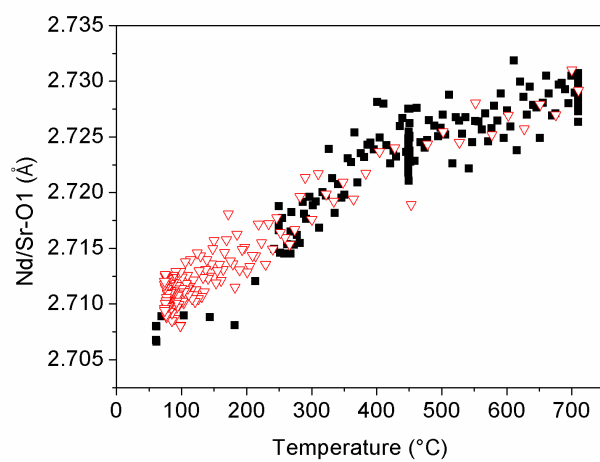

(b)

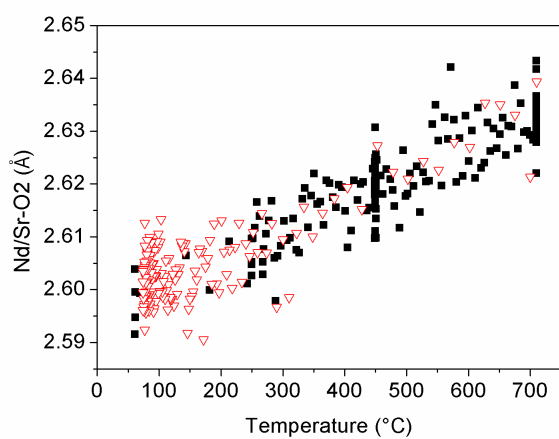

(c)

Figure S11

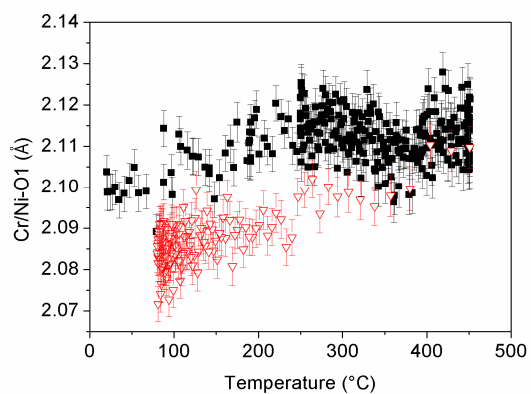

(a)

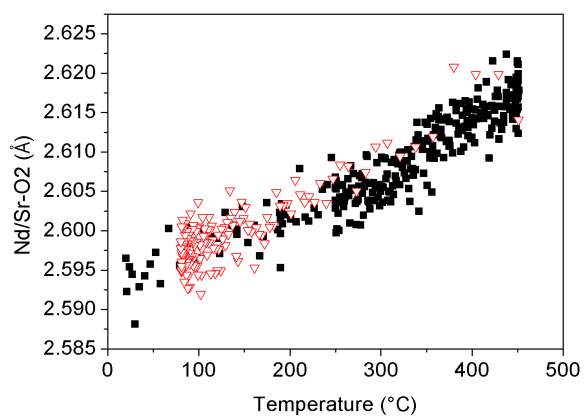

(b)

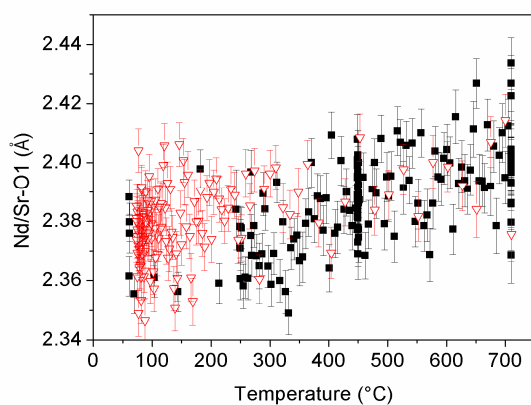

(c)

Figure S12
